# Supplementary material for: Greenhouse conditions induce mineralogical changes and dolomite accumulation in coralline algae on tropical reefs
Source: PubMed Central journal article supplement (PMC3929803; doi:10.1038/ncomms4310), 2014-02-12
Supplement: ncomms4310-s1.pdf [file ncomms4310-s1.pdf]

## Supplementary Information

### Supplementary Figures

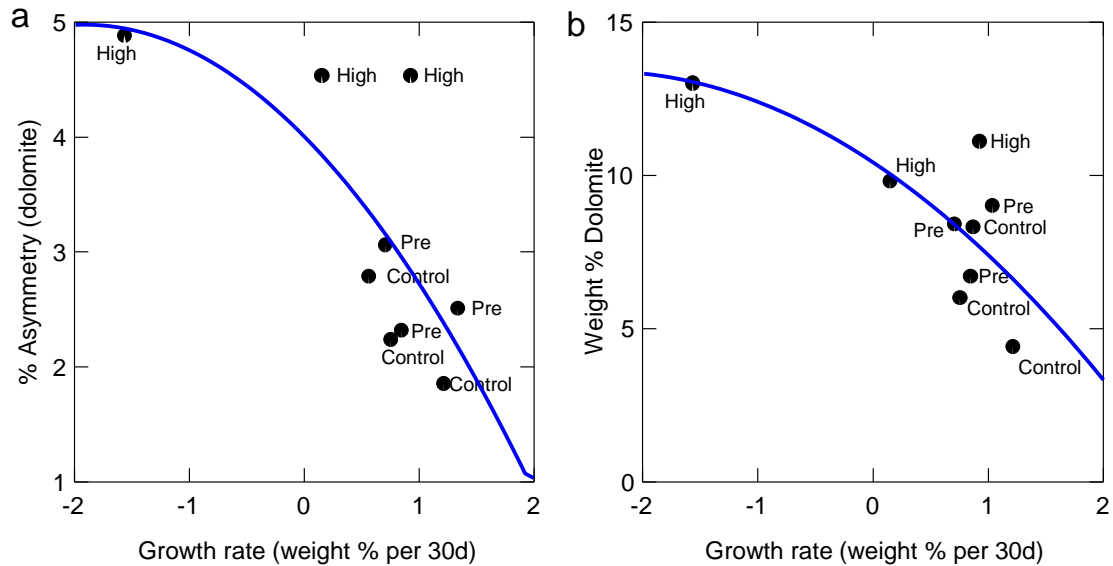

**Supplementary Figure 1.** Relationship between net growth rates of the crustose coralline alga (CCA) *Porolithon onkodes* and dolomite abundance in bulk skeletons under the high temperature treatment (30°C).

Dolomite abundance calculated accordingly to (a) asymmetry method and (b) Rietica method (weight %). CCA samples were exposed to three levels of pCO<sub>2</sub> (Pre = preindustrial, Control = ambient, and High) for a period of two months in Lizard Island, GBR. Net growth rates (positive indicate calcification and negative skeletal dissolution) were normalised to the initial weight of each fragment and presented as percentage of change per 30 days. Regression analyses show positive relation between dissolution and dolomite abundance (a,  $r^2 = 0.48$ ;  $P = 0.039$ ;  $n=9$  and b,  $r^2 = 0.51$ ;  $P = 0.031$ ;  $n=9$ ). A quadratic regression line is included as it seems to better represent the trends in the data.

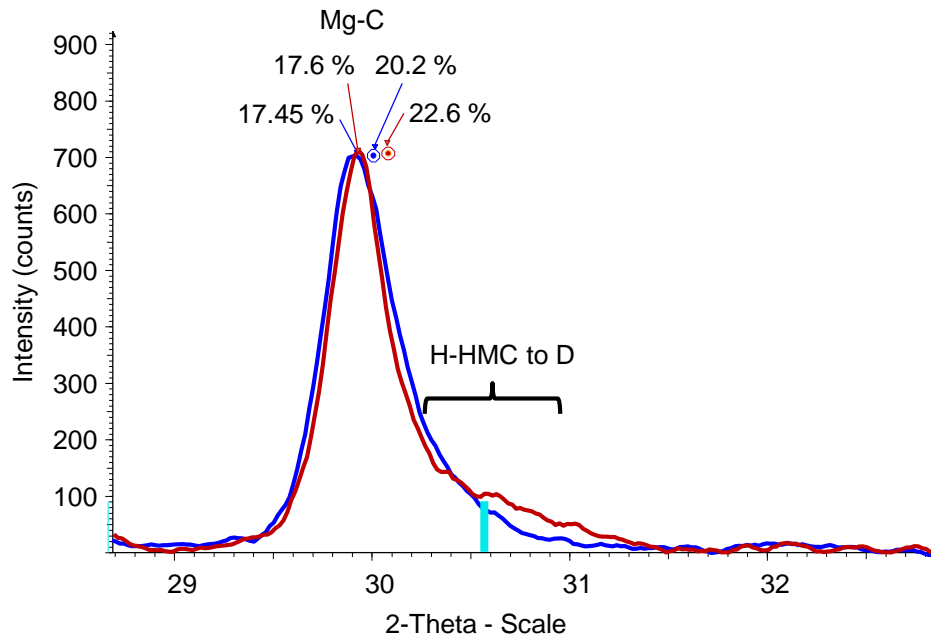

**Supplementary Figure 2.** Asymmetry and peak position.

Application of asymmetry calculations for High CO<sub>2</sub> and 30°C (red) (GD114 in Fig. 4 and 5 of main MS), and pre-industrial CO<sub>2</sub> and 28°C (blue) (GD2 in Fig. 4 of main MS). The peak position mol%'s for both are comparable 17.45 and 17.6, however once the asymmetry is incorporated then the visible difference in curve asymmetry over the Higher Mg-calcite (H-HMC) and dolomite (D) range is reflected in the higher mol% MgCO<sub>3</sub> (22.6) calculated for the High CO<sub>2</sub>/30°C than for the pre-industrial/28° sample (20.2). For the asymmetry % in Fig. 2a (main MS) the peak mol% has been subtracted from the asymmetry mol% to give the net change due to asymmetry.

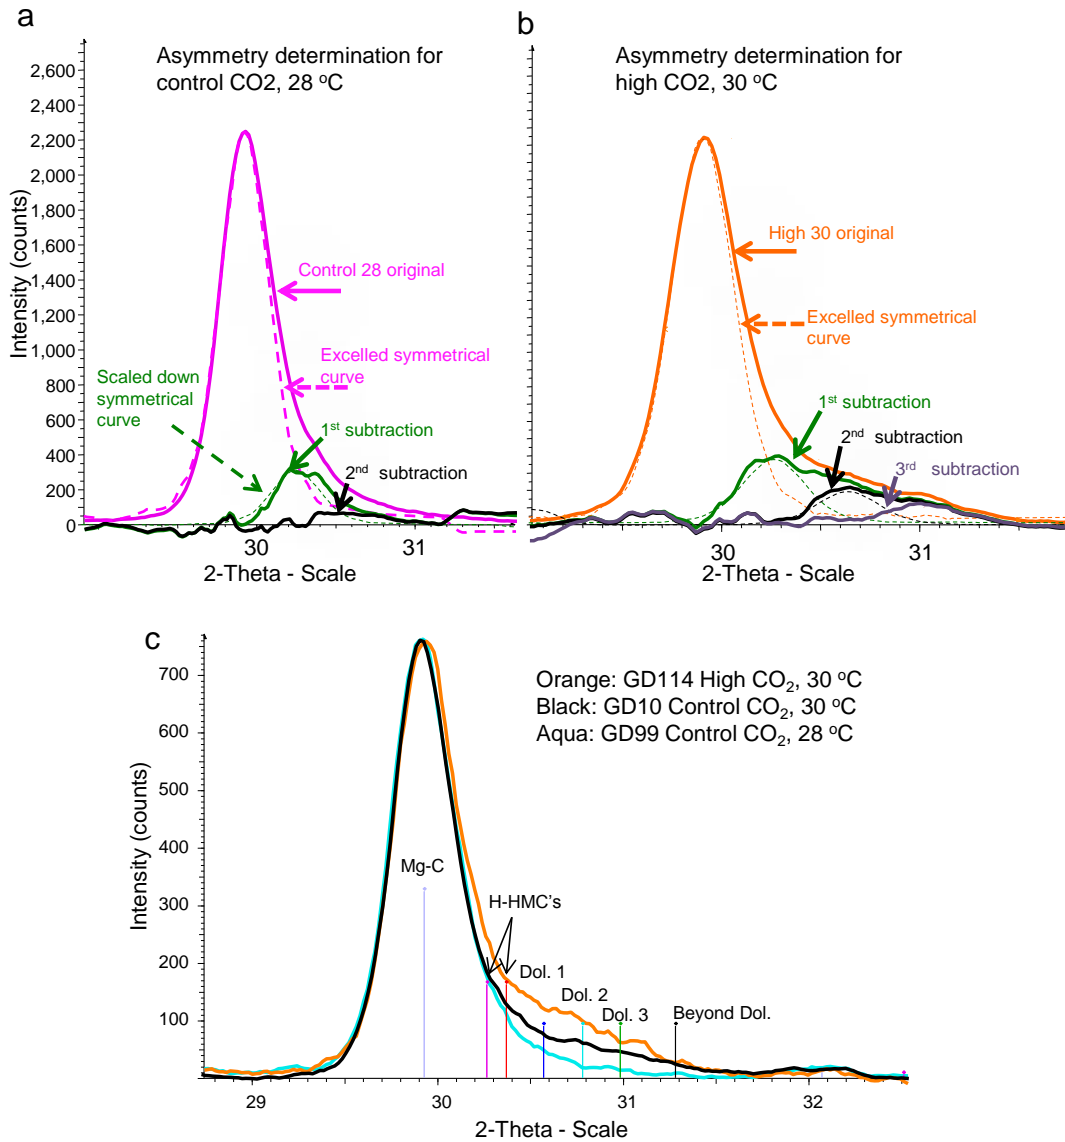

**Supplementary Figure 3.** Subtraction using a symmetrical curve to identify and quantify dolomite phases.

(a) Ambient control samples. (b) High CO<sub>2</sub> high temperature 30°C samples. Scans for each treatment were added and only the average is shown here. (c) Peak positions for refined mineral phases. Examples of scans overlaid for context.

## Supplementary Tables

**Supplementary Table 1. Carbonate chemistry parameters.**

| Treatment                      | T<br>°C | pH-<br>sw      | pCO <sub>2</sub><br>μatm | TA<br>μmol<br>kg <sup>-1</sup> | TC<br>μmol<br>kg <sup>-1</sup> | HCO <sub>3</sub> <sup>-</sup><br>μmol<br>kg <sup>-1</sup> | CO <sub>3</sub> <sup>2-</sup><br>μmol<br>kg <sup>-1</sup> | Ω <sub>cal</sub> | Ω <sub>arag</sub> | Ω <sub>HMc</sub><br>(16.4) | Ω <sub>dol-diso</sub> |
|--------------------------------|---------|----------------|--------------------------|--------------------------------|--------------------------------|-----------------------------------------------------------|-----------------------------------------------------------|------------------|-------------------|----------------------------|-----------------------|
| Pre-<br>industrial<br>(8.15)   | 28      | 8.15<br>(0.06) | 296<br>(57)              | 2398<br>(18)                   | 1978<br>(57)                   | 1675<br>(84)                                              | 296<br>(30)                                               | 7.14<br>(0.71)   | 4.76<br>(0.48)    | 1.73<br>(0.17)             | 151.82<br>(30.49)     |
|                                | 30      | 8.15<br>(0.06) | 293<br>(57)              | 2402<br>(17)                   | 1960<br>(55)                   | 1642<br>(84)                                              | 311<br>(31)                                               | 7.54<br>(0.75)   | 5.06<br>(0.50)    | 1.88<br>(0.19)             | 188.41<br>(38)        |
| Ambient -<br>Control<br>(8.09) | 28      | 8.09<br>(0.03) | 357<br>(35)              | 2401<br>(17)                   | 2029<br>(31)                   | 1754<br>(41)                                              | 265<br>(13)                                               | 6.40<br>(0.31)   | 4.26<br>(0.21)    | 1.56<br>(0.08)             | 121.25<br>(11.49)     |
|                                | 30      | 8.09<br>(0.03) | 355<br>(33)              | 2406<br>(27)                   | 2012<br>(32)                   | 1724<br>(40)                                              | 280<br>(14)                                               | 6.78<br>(0.35)   | 4.55<br>(0.23)    | 1.69<br>(0.09)             | 151.22<br>(15.12)     |
| High<br>(7.63)                 | 28      | 7.63<br>(0.02) | 1233<br>(60)             | 2415<br>(21)                   | 2285<br>(17)                   | 2139<br>(15)                                              | 114<br>(5)                                                | 2.75<br>(0.13)   | 1.83<br>(0.09)    | 0.67<br>(0.03)             | 22.38<br>(2.074)      |
|                                | 30      | 7.64<br>(0.02) | 1225<br>(77)             | 2420<br>(35)                   | 2276<br>(37)                   | 2123<br>(37)                                              | 123<br>(5)                                                | 2.97<br>(0.12)   | 1.99<br>(0.08)    | 0.74<br>(0.03)             | 29.07<br>(2.281)      |

T: temperature; pH: pH seawater scale; pCO<sub>2</sub>: carbon dioxide partial pressure; TA: total alkalinity; TC: total carbon; HCO<sub>3</sub>: bicarbonate; CO<sub>3</sub>: carbonate; Ω<sub>cal</sub>: saturation state of seawater with respect to calcite; Ω<sub>arag</sub>: aragonite saturation state; Ω<sub>HMc</sub>: High-Magnesium calcite saturation state (for 16.4 %mol MgCO<sub>3</sub>). Ω<sub>dol-diso</sub>: disordered dolomite saturation state. Values are means of 6 samples (standard deviation).

**Supplementary Table 2. Analyses of variance (ANOVA) to test for the effects of CO<sub>2</sub>, temperature and tissue layer on *Porolithon onkodes* mineralogy.**

| Source of variation           | Df | MS    | F      | P                                                 | Conclusion (Tukey test) |
|-------------------------------|----|-------|--------|---------------------------------------------------|-------------------------|
| <i>Asymmetry (dolomite)</i>   |    |       |        |                                                   |                         |
| CO <sub>2</sub>               | 2  | 0.32  | 1.45   | SL = 0.131;<br>BU & 28 = 0.817<br>BU & 30 < 0.001 | High > Pre = Cont       |
| Temperature (Temp)            | 1  | 1.46  | 6.72   | SL = 0.139<br>BU & HCO <sub>2</sub> = 0.002       | 30 > 28                 |
| Layer                         | 1  | 47.81 | 219.46 | <0.001                                            | BU > SL                 |
| CO <sub>2</sub> *Temp         | 2  | 1.85  | 8.50   | 0.002                                             | s                       |
| CO <sub>2</sub> *Layer        | 2  | 1.94  | 8.90   | 0.001                                             | s                       |
| Temp * Layer                  | 1  | 0.09  | 0.40   | 0.532                                             | ns                      |
| CO <sub>2</sub> *Temp * Layer | 2  | 1.7   | 7.80   | 0.002                                             | s                       |
| Error                         | 24 | 0.22  |        |                                                   |                         |
| <i>Aragonite (% transf.)</i>  |    |       |        |                                                   |                         |
| CO <sub>2</sub>               | 2  | 0.47  | 16.02  | 30 = 0.568; 28=0.001                              | Pre > Cont = High       |
| Temperature                   | 1  | 0.59  | 19.90  | Pre = 0.001                                       | 28 > 30                 |
| Layer                         | 1  | 0.78  | 26.57  | <0.001                                            | BU > SL                 |
| CO <sub>2</sub> *Temp         | 2  | 0.21  | 7.04   | 0.004                                             | s                       |
| CO <sub>2</sub> *Layer        | 2  | 0.03  | 1.0    | 0.383                                             | ns                      |
| Temp * Layer                  | 1  | <0.01 | 0.05   | 0.830                                             | ns                      |
| CO <sub>2</sub> *Temp * Layer | 2  | 0.01  | 0.42   | 0.664                                             | ns                      |
| Error                         | 24 | 0.03  |        |                                                   |                         |
| <i>MgCO<sub>3</sub></i>       |    |       |        |                                                   |                         |
| CO <sub>2</sub>               | 2  | 0.43  | 2.29   | 0.123                                             | ns                      |
| Temperature                   | 1  | 0.63  | 3.37   | SL=0.004; BU=0.34                                 | 30 > 28                 |
| Layer                         | 1  | 13.79 | 73.65  | <0.001                                            | BU > SL                 |
| CO <sub>2</sub> *Temp         | 2  | 0.10  | 0.52   | 0.604                                             | ns                      |
| CO <sub>2</sub> *Layer        | 2  | 0.30  | 1.59   | 0.226                                             | ns                      |
| Temp * Layer                  | 1  | 1.96  | 10.47  | 0.004                                             | s                       |
| CO <sub>2</sub> *Temp * Layer | 2  | 0.22  | 1.19   | 0.322                                             | ns                      |
| Error                         | 24 | 0.19  |        |                                                   |                         |

SL: surface layer; BU: Bulk tissue. HCO<sub>2</sub>; High CO<sub>2</sub>; Pre: pre-industrial. Df: degrees of freedom, MS: mean square, F: F-ratio.

**Supplementary Table 3. Mineral quantities (weight %, normalized to aragonite) in bulk skeletons of *Porolithon onkodes*.** Data presented for each CO<sub>2</sub> and temperature treatment.

| CO <sub>2</sub> | T°C | Sample  | Mineral (weight %) |       |       |       |       |           | BD  |
|-----------------|-----|---------|--------------------|-------|-------|-------|-------|-----------|-----|
|                 |     |         | Mg-C               | H-HMC | Dol 1 | Dol 2 | Dol 3 | Total Dol |     |
| Pre             | 28  | GD25    | 88.5               | 4.3   | 7.2   | 0.0   | 0.0   | 7.2       | 0.0 |
| Pre             | 28  | GD69    | 89.4               | 3.1   | 6.0   | 0.8   | 0.6   | 7.4       | 0.0 |
| Pre             | 28  | GD2     | 88.5               | 4.3   | 7.2   | 0.0   | 0.0   | 7.2       | 0.0 |
|                 |     | average | 88.8               | 3.9   | 6.8   | 0.3   | 0.2   | 7.3       | 0.0 |
| Pre             | 30  | GD101   | 86.9               | 4.6   | 4.2   | 3.1   | 1.3   | 8.6       | 0.0 |
| Pre             | 30  | GD40    | 82.2               | 6.3   | 3.4   | 3.2   | 2.8   | 9.4       | 2.5 |
| Pre             | 30  | GD18    | 78.0               | 15.2  | 6.9   | 0.0   | 0.0   | 6.9       | 0.0 |
|                 |     | average | 82.3               | 8.7   | 4.8   | 2.1   | 1.3   | 8.2       | 0.8 |
| Cont            | 28  | GD62    | 65.5               | 23.0  | 11.5  | 0.0   | 0.0   | 11.5      | 0.0 |
| Cont            | 28  | GD99    | 83.5               | 12.5  | 4.0   | 0.0   | 0.0   | 4         | 0.0 |
| Cont            | 28  | GD49    | 81.8               | 6.3   | 3.2   | 2.3   | 2.6   | 8.1       | 3.9 |
|                 |     | average | 76.9               | 13.9  | 6.2   | 0.8   | 0.9   | 7.9       | 1.3 |
| Cont            | 30  | GD24    | 83.5               | 11.9  | 4.5   | 0.0   | 0.0   | 4.5       | 0.0 |
| Cont            | 30  | GD36    | 79.5               | 14.2  | 6.3   | 0.0   | 0.0   | 6.3       | 0.0 |
| Cont            | 30  | GD10    | 78.4               | 5.9   | 3.0   | 1.9   | 3.5   | 8.4       | 7.3 |
|                 |     | average | 80.5               | 10.7  | 4.6   | 0.6   | 1.2   | 6.4       | 2.4 |
| High            | 28  | GD37    | 83.1               | 13.0  | 3.9   | 0.0   | 0.0   | 3.9       | 0.0 |
| High            | 28  | GD81    | 84.8               | 12.2  | 3.0   | 0.0   | 0.0   | 3         | 0.0 |
| High            | 28  | GD7     | 81.5               | 13.8  | 4.7   | 0.0   | 0.0   | 4.7       | 0.0 |
|                 |     | average | 83.1               | 13.0  | 3.9   | 0.0   | 0.0   | 3.9       | 0.0 |
| High            | 30  | GD48    | 79.5               | 6.1   | 4.0   | 3.3   | 3.9   | 11.2      | 3.4 |
| High            | 30  | GD71    | 80.3               | 7.5   | 3.3   | 3.8   | 3.1   | 10.2      | 2.2 |
| High            | 30  | GD114   | 76.8               | 7.0   | 4.9   | 4.4   | 4.1   | 13.4      | 2.9 |
|                 |     | average | 78.8               | 6.9   | 4.0   | 3.8   | 3.7   | 11.5      | 2.8 |

Mg-C: Magnesium calcite; H-HMC: Higher high magnesium calcite. Dol: dolomite.

BD: beyond dolomite.

**Supplementary Table 4. Mineral quantities (weight %) in bulk skeletons of**

*Porolithon onkodes*. Data presented for each CO<sub>2</sub> and temperature treatment and

includes aragonite (Arag) from subtraction method.

| CO <sub>2</sub> | T°C | Sample  | Mineral (weight %) |      |       |       |       |       |           |     |
|-----------------|-----|---------|--------------------|------|-------|-------|-------|-------|-----------|-----|
|                 |     |         | Arag-Sub           | Mg-C | H-HMC | Dol 1 | Dol 2 | Dol 3 | Total Dol | BD  |
| Pre             | 28  | GD25    | 7.5                | 81.8 | 4.0   | 6.7   | 0.0   | 0.0   | 6.7       | 0.0 |
| Pre             | 28  | GD69    | 8.0                | 82.3 | 2.8   | 5.5   | 0.7   | 0.5   | 6.7       | 0.0 |
| Pre             | 28  | GD2     | 4.4                | 84.5 | 4.1   | 6.9   | 0.0   | 0.0   | 6.9       | 0.0 |
|                 |     | average | 6.7                | 82.9 | 3.7   | 6.4   | 0.2   | 0.2   | 6.8       | 0.0 |
| Pre             | 30  | GD101   | 1.4                | 85.6 | 4.5   | 4.1   | 3.1   | 1.3   | 8.5       | 0.0 |
| Pre             | 30  | GD40    | 1.5                | 80.9 | 6.2   | 3.3   | 3.1   | 2.7   | 9.1       | 2.4 |
| Pre             | 30  | GD18    | 1.4                | 76.9 | 15.0  | 6.8   | 0.0   | 0.0   | 6.8       | 0.0 |
|                 |     | average | 1.4                | 81.1 | 8.5   | 4.7   | 2.1   | 1.3   | 8.1       | 0.8 |
| Cont            | 28  | GD62    | 2.2                | 64.1 | 22.5  | 11.2  | 0.0   | 0.0   | 11.2      | 0.0 |
| Cont            | 28  | GD99    | 3.4                | 80.7 | 12.1  | 3.8   | 0.0   | 0.0   | 3.8       | 0.0 |
| Cont            | 28  | GD49    | 3.9                | 78.6 | 6.0   | 3.1   | 2.2   | 2.5   | 7.8       | 3.7 |
|                 |     | average | 3.1                | 74.5 | 13.5  | 6.1   | 0.7   | 0.8   | 7.6       | 1.2 |
| Cont            | 30  | GD24    | 1.8                | 82.0 | 11.7  | 4.5   | 0.0   | 0.0   | 4.5       | 0.0 |
| Cont            | 30  | GD36    | 2.7                | 77.4 | 13.8  | 6.1   | 0.0   | 0.0   | 6.1       | 0.0 |
| Cont            | 30  | GD10    | 0.0                | 78.4 | 5.9   | 3.0   | 1.9   | 3.5   | 8.4       | 7.3 |
|                 |     | average | 1.5                | 79.3 | 10.5  | 4.5   | 0.6   | 1.2   | 6.3       | 2.4 |
| High            | 28  | GD37    | 0.0                | 83.1 | 13.0  | 3.9   | 0.0   | 0.0   | 3.9       | 0.0 |
| High            | 28  | GD81    | 1.5                | 83.5 | 12.0  | 3.0   | 0.0   | 0.0   | 3         | 0.0 |
| High            | 28  | GD7     | 1.6                | 80.2 | 13.5  | 4.7   | 0.0   | 0.0   | 4.7       | 0.0 |
|                 |     | average | 1.0                | 82.3 | 12.9  | 3.8   | 0.0   | 0.0   | 3.8       | 0.0 |
| High            | 30  | GD48    | 0.0                | 79.5 | 6.1   | 4.0   | 3.3   | 3.9   | 11.2      | 3.4 |
| High            | 30  | GD71    | 1.5                | 79.1 | 7.4   | 3.2   | 3.7   | 3.0   | 9.9       | 2.1 |
| High            | 30  | GD114   | 0.9                | 76.1 | 6.9   | 4.8   | 4.3   | 4.0   | 13.1      | 2.9 |
|                 |     | average | 0.8                | 78.2 | 6.8   | 4.0   | 3.8   | 3.6   | 11.4      | 2.8 |

Mg-C: Magnesium calcite; H-HMC: Higher magnesium calcite. Dol: dolomite. BD:

beyond dolomite.

**Supplementary Table 5. Analyses of variance (ANOVA) to test for the effects of CO<sub>2</sub> and temperature on the relative mineral quantities in bulk skeletons of *Porolithon onkodes*. Data from Supplementary Table 4.**

| Source of variation          | Df | MS    | F     | P                                                                | Conclusion (Tukey test) |
|------------------------------|----|-------|-------|------------------------------------------------------------------|-------------------------|
| <i>Dolomite (%)</i>          |    |       |       |                                                                  |                         |
| CO <sub>2</sub>              | 2  | 0.71  | 0.191 | Within 28°C = 0.172<br>Within 30°C = 0.023                       | ns<br>High > Cont       |
| Temperature (Temp)           | 1  | 29.13 | 7.83  | Within Pre = 0.119<br>Within Cont = 0.628<br>Within High = 0.002 | ns<br>ns<br>30 > 28     |
| CO <sub>2</sub> *Temp        | 2  | 30.60 | 8.23  | 0.006                                                            | s                       |
| Error                        | 12 | 3.72  |       |                                                                  |                         |
| <i>Aragonite (% transf.)</i> |    |       |       |                                                                  |                         |
| CO <sub>2</sub>              | 2  | 0.22  | 6.28  | 0.014                                                            | Pre > High              |
| Temperature                  | 1  | 0.33  | 9.25  | 0.010                                                            | 28 > 30                 |
| CO <sub>2</sub> *Temp        | 2  | 0.07  | 2.07  | 0.168                                                            | ns                      |
| Error                        | 12 | 0.04  |       |                                                                  |                         |
| <i>MgCO<sub>3</sub></i>      |    |       |       |                                                                  |                         |
| CO <sub>2</sub>              | 2  | 40.86 | 2.13  | 0.162                                                            | ns                      |
| Temperature                  | 1  | 0.47  | 0.02  | 0.879                                                            | ns                      |
| CO <sub>2</sub> *Temp        | 2  | 31.50 | 1.64  | 0.235                                                            | ns                      |
| Error                        | 12 | 19.21 |       |                                                                  |                         |

HCO<sub>2</sub>; Pre: pre-industrial CO<sub>2</sub>; Cont: control CO<sub>2</sub>; High: High CO<sub>2</sub>.



**Supplementary Table 6. Unit cell parameters after refinement in Rietica.**

|                 | Unit cell parameters |         |                 | Mol % MgCO <sub>3</sub> |                        |
|-----------------|----------------------|---------|-----------------|-------------------------|------------------------|
|                 | a                    | C       | <i>d</i> -space | Ordered                 | Disordered             |
| Mg-C            | 4.91906              | 16.7439 | 2.986           | 17.5                    | Not applicable         |
| H-HMC - lower   | 4.87711              | 16.5222 | 2.953           | 28.5                    | ~32                    |
| H-HMC - upper   | 4.869                | 16.44   | 2.9428          | 32                      | ~41 (range ~35.6-48.5) |
| Dolomite 1      | 4.842                | 16.32   | 2.9247          | 38                      | ~48 (range ~40-55)     |
| Dolomite 2      | 4.826                | 16.16   | 2.9045          | 44.8                    | > ~54                  |
| Dolomite 3      | 4.81                 | 16.01   | 2.8863          | 50.9                    | no value available     |
| Beyond Dolomite | 4.7482               | 15.914  | 2.8587          | 60.1                    | no value available     |

Disordered compositions estimated from Zhang et al. <sup>35</sup>.

**Supplementary Table 7. Calibration using magnesite composition for Dolomite 3**

**and beyond dolomite.** This is the closest calibration for the samples containing an apparent magnesite shoulder (and magnesite confirmed by SEM), however appears to result in an overestimation of Mg for the High CO<sub>2</sub>, 30°C samples. Overall average difference (diff) = 0.38%.

| CO <sub>2</sub> | T°C | Sample | mol% MgCO <sub>3</sub>        |       |       |       |       |       | calc Mg | ICP Mg | diff |  |
|-----------------|-----|--------|-------------------------------|-------|-------|-------|-------|-------|---------|--------|------|--|
|                 |     |        | 17.5%                         | 30.0% | 47.0% | 55.0% | 95.0% | 95.0% |         |        |      |  |
|                 |     |        | HMC                           | H-HMC | Dol1  | Dol2  | Dol3  | BD    |         |        |      |  |
| Pre             | 28  | GD25   | 14.3                          | 1.2   | 3.1   | 0.0   | 0.0   | 0.0   | 18.7    | 20.3   | -1.6 |  |
| Pre             | 28  | GD69   | 14.4                          | 0.9   | 2.6   | 0.4   | 0.5   | 0.0   | 18.8    | 20.2   | -1.4 |  |
| Pre             | 28  | GD2    | 14.8                          | 1.2   | 3.3   | 0.0   | 0.0   | 0.0   | 19.3    | 18.7   | 0.6  |  |
| Pre             | 30  | GD101  | 15.0                          | 1.3   | 1.9   | 1.7   | 1.2   | 0.0   | 21.2    | 19.8   | 1.4  |  |
| Pre             | 30  | GD40   | 14.2                          | 1.8   | 1.6   | 1.7   | 2.6   | 2.3   | 24.2    | 25.1   | -0.9 |  |
| Pre             | 30  | GD18   | 13.5                          | 4.5   | 3.2   | 0.0   | 0.0   | 0.0   | 21.1    | 18.0   | 3.1  |  |
| Cont            | 28  | GD62   | 11.2                          | 6.7   | 5.3   | 0.0   | 0.0   | 0.0   | 23.2    | 22.4   | 0.8  |  |
| Cont            | 28  | GD99   | 14.1                          | 3.6   | 1.8   | 0.0   | 0.0   | 0.0   | 19.6    | 17.1   | 2.5  |  |
| Cont            | 28  | GD49   | 13.8                          | 1.8   | 1.5   | 1.2   | 2.4   | 3.5   | 24.2    | 27.0   | -2.8 |  |
| Cont            | 30  | GD24   | 14.4                          | 3.5   | 2.1   | 0.0   | 0.0   | 0.0   | 20.0    | 18.9   | 1.1  |  |
| Cont            | 30  | GD36   | 13.5                          | 4.1   | 2.9   | 0.0   | 0.0   | 0.0   | 20.5    | 20.0   | 0.5  |  |
| Cont            | 30  | GD10   | 13.7                          | 1.8   | 1.4   | 1.0   | 3.3   | 7.0   | 28.2    | 29.8   | -1.6 |  |
| High            | 28  | GD37   | 14.5                          | 3.9   | 1.8   | 0.0   | 0.0   | 0.0   | 20.3    | 21.3   | -1.0 |  |
| High            | 28  | GD81   | subsample not run for ICP-AES |       |       |       |       |       |         |        |      |  |
| High            | 28  | GD7    | 14.0                          | 4.1   | 2.2   | 0.0   | 0.0   | 0.0   | 20.3    | 18.8   | 1.5  |  |
| High            | 30  | GD48   | 13.9                          | 1.8   | 1.9   | 1.8   | 3.7   | 3.2   | 26.3    | 23.7   | 2.6  |  |
| High            | 30  | GD71   | 13.8                          | 2.2   | 1.5   | 2.1   | 2.9   | 2.0   | 24.5    | 23.4   | 1.1  |  |
| High            | 30  | GD114  | 13.3                          | 2.1   | 2.3   | 2.4   | 3.8   | 2.8   | 26.6    | 26.0   | 0.6  |  |

HMC: High magnesium calcite; H-HMC: Higher magnesium calcite. Dol: dolomite.

BD: beyond dolomite. Calc Mg: calculated bulk Mg as per Rietica quantification. ICP

Mg: bulk Mg concentration as per Inductively Coupled Plasma – Atomic Emission

Spectroscopy.

**Supplementary Table 8. Calibration using 65 mol% for dolomite 3 with magnesite**

**samples excluded.** The average difference (diff) is 0.3 mol%. Overall average

difference = 0.26%.

| CO <sub>2</sub> | T°C | Sample | mol% MgCO <sub>3</sub>        |       |       |       |       |       | calc<br>Mg | ICP<br>Mg | diff |  |
|-----------------|-----|--------|-------------------------------|-------|-------|-------|-------|-------|------------|-----------|------|--|
|                 |     |        | 17.5%                         | 27.0% | 47.0% | 55.0% | 65.0% | 95.0% |            |           |      |  |
|                 |     |        | HMC                           | H-HMC | Dol1  | Dol2  | Dol3  | BD    |            |           |      |  |
| Pre             | 28  | GD25   | 14.3                          | 1.1   | 3.1   | 0.0   | 0.0   | 0.0   | 18.5       | 20.3      | -1.8 |  |
| Pre             | 28  | GD69   | 14.4                          | 0.8   | 2.6   | 0.4   | 0.3   | 0.0   | 18.5       | 20.2      | -1.7 |  |
| Pre             | 28  | GD2    | 14.8                          | 1.1   | 3.3   | 0.0   | 0.0   | 0.0   | 19.2       | 18.7      | 0.5  |  |
| Pre             | 30  | GD101  | 15.0                          | 1.2   | 1.9   | 1.7   | 0.8   | 0.0   | 20.6       | 19.8      | 0.8  |  |
| Pre             | 30  | GD40   | n/d                           | n/d   | n/d   | n/d   | n/d   | n/d   | n/d        | n/d       | n/d  |  |
| Pre             | 30  | GD18   | 13.5                          | 4.0   | 3.2   | 0.0   | 0.0   | 0.0   | 20.7       | 18.0      | 2.7  |  |
| Cont            | 28  | GD62   | 11.2                          | 6.1   | 5.3   | 0.0   | 0.0   | 0.0   | 22.6       | 22.4      | 0.2  |  |
| Cont            | 28  | GD99   | 14.1                          | 3.3   | 1.8   | 0.0   | 0.0   | 0.0   | 19.2       | 17.1      | 2.1  |  |
| Cont            | 28  | GD49   | n/d                           | n/d   | n/d   | n/d   | n/d   | n/d   | n/d        | n/d       | n/d  |  |
| Cont            | 30  | GD24   | 14.4                          | 3.2   | 2.1   | 0.0   | 0.0   | 0.0   | 19.6       | 18.9      | 0.7  |  |
| Cont            | 30  | GD36   | 13.5                          | 3.7   | 2.9   | 0.0   | 0.0   | 0.0   | 20.1       | 20.0      | 0.1  |  |
| Cont            | 30  | GD10   | n/d                           | n/d   | n/d   | n/d   | n/d   | n/d   | n/d        | n/d       | n/d  |  |
| High            | 28  | GD37   | 14.5                          | 3.5   | 1.8   | 0.0   | 0.0   | 0.0   | 19.9       | 21.3      | -1.4 |  |
| High            | 28  | GD81   | subsample not run for ICP-AES |       |       |       |       |       |            |           |      |  |
| High            | 28  | GD7    | 14.0                          | 3.7   | 2.2   | 0.0   | 0.0   | 0.0   | 19.9       | 18.8      | 1.1  |  |
| High            | 30  | GD48   | 13.9                          | 1.6   | 1.9   | 1.8   | 2.5   | 3.2   | 24.9       | 23.7      | 1.2  |  |
| High            | 30  | GD71   | 13.8                          | 2.0   | 1.5   | 2.1   | 2.0   | 2.0   | 23.4       | 23.4      | 0.0  |  |
| High            | 30  | GD114  | 13.3                          | 1.9   | 2.3   | 2.4   | 2.6   | 2.8   | 25.2       | 26.0      | -0.8 |  |

n/d = no data. HMC: High magnesium calcite; H-HMC: Higher magnesium calcite.

Dol: dolomite. BD: beyond dolomite. Calc Mg: calculated bulk Mg as per Rietica

quantification. ICP Mg: bulk Mg concentration as per Inductively Coupled Plasma –

Atomic Emission Spectroscopy.
